# Supplementary material
Source: HighWire-hosted journal article supplement (https://bmjopen.bmj.com/content/9/3/e025026)
Supplement: inline-supplementary-material-3 [file inline-supplementary-material-3.pdf]

### Supplementary file 3

#### Major complications

- Stroke (stroke)
- Anaphylaxis
- Cardiac arrest
- Respiratory arrest
- Injury to a vital organ or blood vessel
- Pulmonary collapse
- Thromboembolic complications requiring intervention
- Empyema
- Broncho-pulmonary fistula
- Chylous fistula
- Leakage of the main bronchus with subsequent thoracotomy or drainage for more than 4 days
- Hemothorax requiring drainage
- Colonic infarction
- Myocardial infarction
- Congestive heart failure
- Acute respiratory insufficiency
- Death
- Thoracic wound
- Brachial plexopathy
- Mechanical ventilation prolonged beyond 48 hours after surgery

#### Intermediate complication

- Cardiac arrhythmias
- Mucous plug requiring bronchoscopy
- Bronchitis
- Respiratory distress
- Diabetes caused by steroids
- Pain requiring consultation with a pain specialist
- Pleural effusion
- Fever requiring antibiotic therapy
- Cost fracture
- Hemorrhage requiring blood perfusion
- Hospitalization required post-exploration
- Infection requiring antibiotic therapy
- Myocardial ischemia / ST segment elevation
- Paralysis of the vocal cords
- Pneumonia
- Pneumothorax requiring intubation
- Sepsis
- Splenomegaly with infarction of the spleen

#### Minor complications

- Atelectasis
- bronchospasm
- Subcutaneous emphysema
- Ileus
- Paresthesia / hyperesthesia
- Pneumothorax not requiring intubation
- Allergic reaction
- Vasovagal reaction / hypotension
